# Supplementary material for: CD80 Expression Correlates with IL-6 Production in THP-1-Like Macrophages Costimulated with LPS and Dialyzable Leukocyte Extract (Transferon®)
Source: J Immunol Res. 2019 Apr 10;2019:2198508. doi: 10.1155/2019/2198508 (PMC6481127; doi:10.1155/2019/2198508)
Supplement: Supplementary Materials — Supplementary Figure 1: Transferon® did not modify HLA-DR expression. Macrophage-like THP1 cells were treated with 0.1 μg/mL, 1 μg/mL, and 10 μg/mL of Transferon® with or without LPS. After 24 hours of exposure, the cells were stained with an anti-HLA-DR. [file 2198508.f1.docx]

**CD80 expression correlates with IL-6 production in THP-1 like macrophages costimulated with LPS and Dialyzable Leukocyte Extract (Transferon®)**

Alexis P. Jiménez-Uribe§1, Hugo Valencia-Martínez§1, Gregorio Carballo-Uicab1, Luis Vallejo-Castillo1,2, Emilio Medina-Rivero1, Rommel Chacón-Salinas1,3, Lenin Pavón*4, Marco A. Velasco-Velázquez5, Gabriela Mellado-Sánchez1, Sergio Estrada-Parra3, Sonia M. Pérez-Tapia*1,3.

1 Unidad de Desarrollo e Investigación en Bioprocesos (UDIBI), Escuela Nacional de Ciencias Biológicas, Instituto Politécnico Nacional. Ciudad de México 11340, México.

2 Departamento de Farmacología, Centro de Investigación y de Estudios Avanzados (Cinvestav) del IPN. Ciudad de México 07360, México.

3 Departamento de Inmunología, Escuela Nacional de Ciencias Biológicas, Instituto Politécnico Nacional. Ciudad de México 11340, México.

4 Laboratorio de Psicoinmunología, Dirección de Investigaciones en Neurociencias del Instituto Nacional de Psiquiatría Ramón de la Fuente. Ciudad de México 14370, México.

5 Departamento de Farmacología y Unidad Periférica de Investigación en Biomedicina Traslacional (CMN 20 de noviembre, ISSSTE), Facultad de Medicina, Universidad Nacional Autónoma de México, Ciudad Universitaria. Ciudad de México 04510, México.


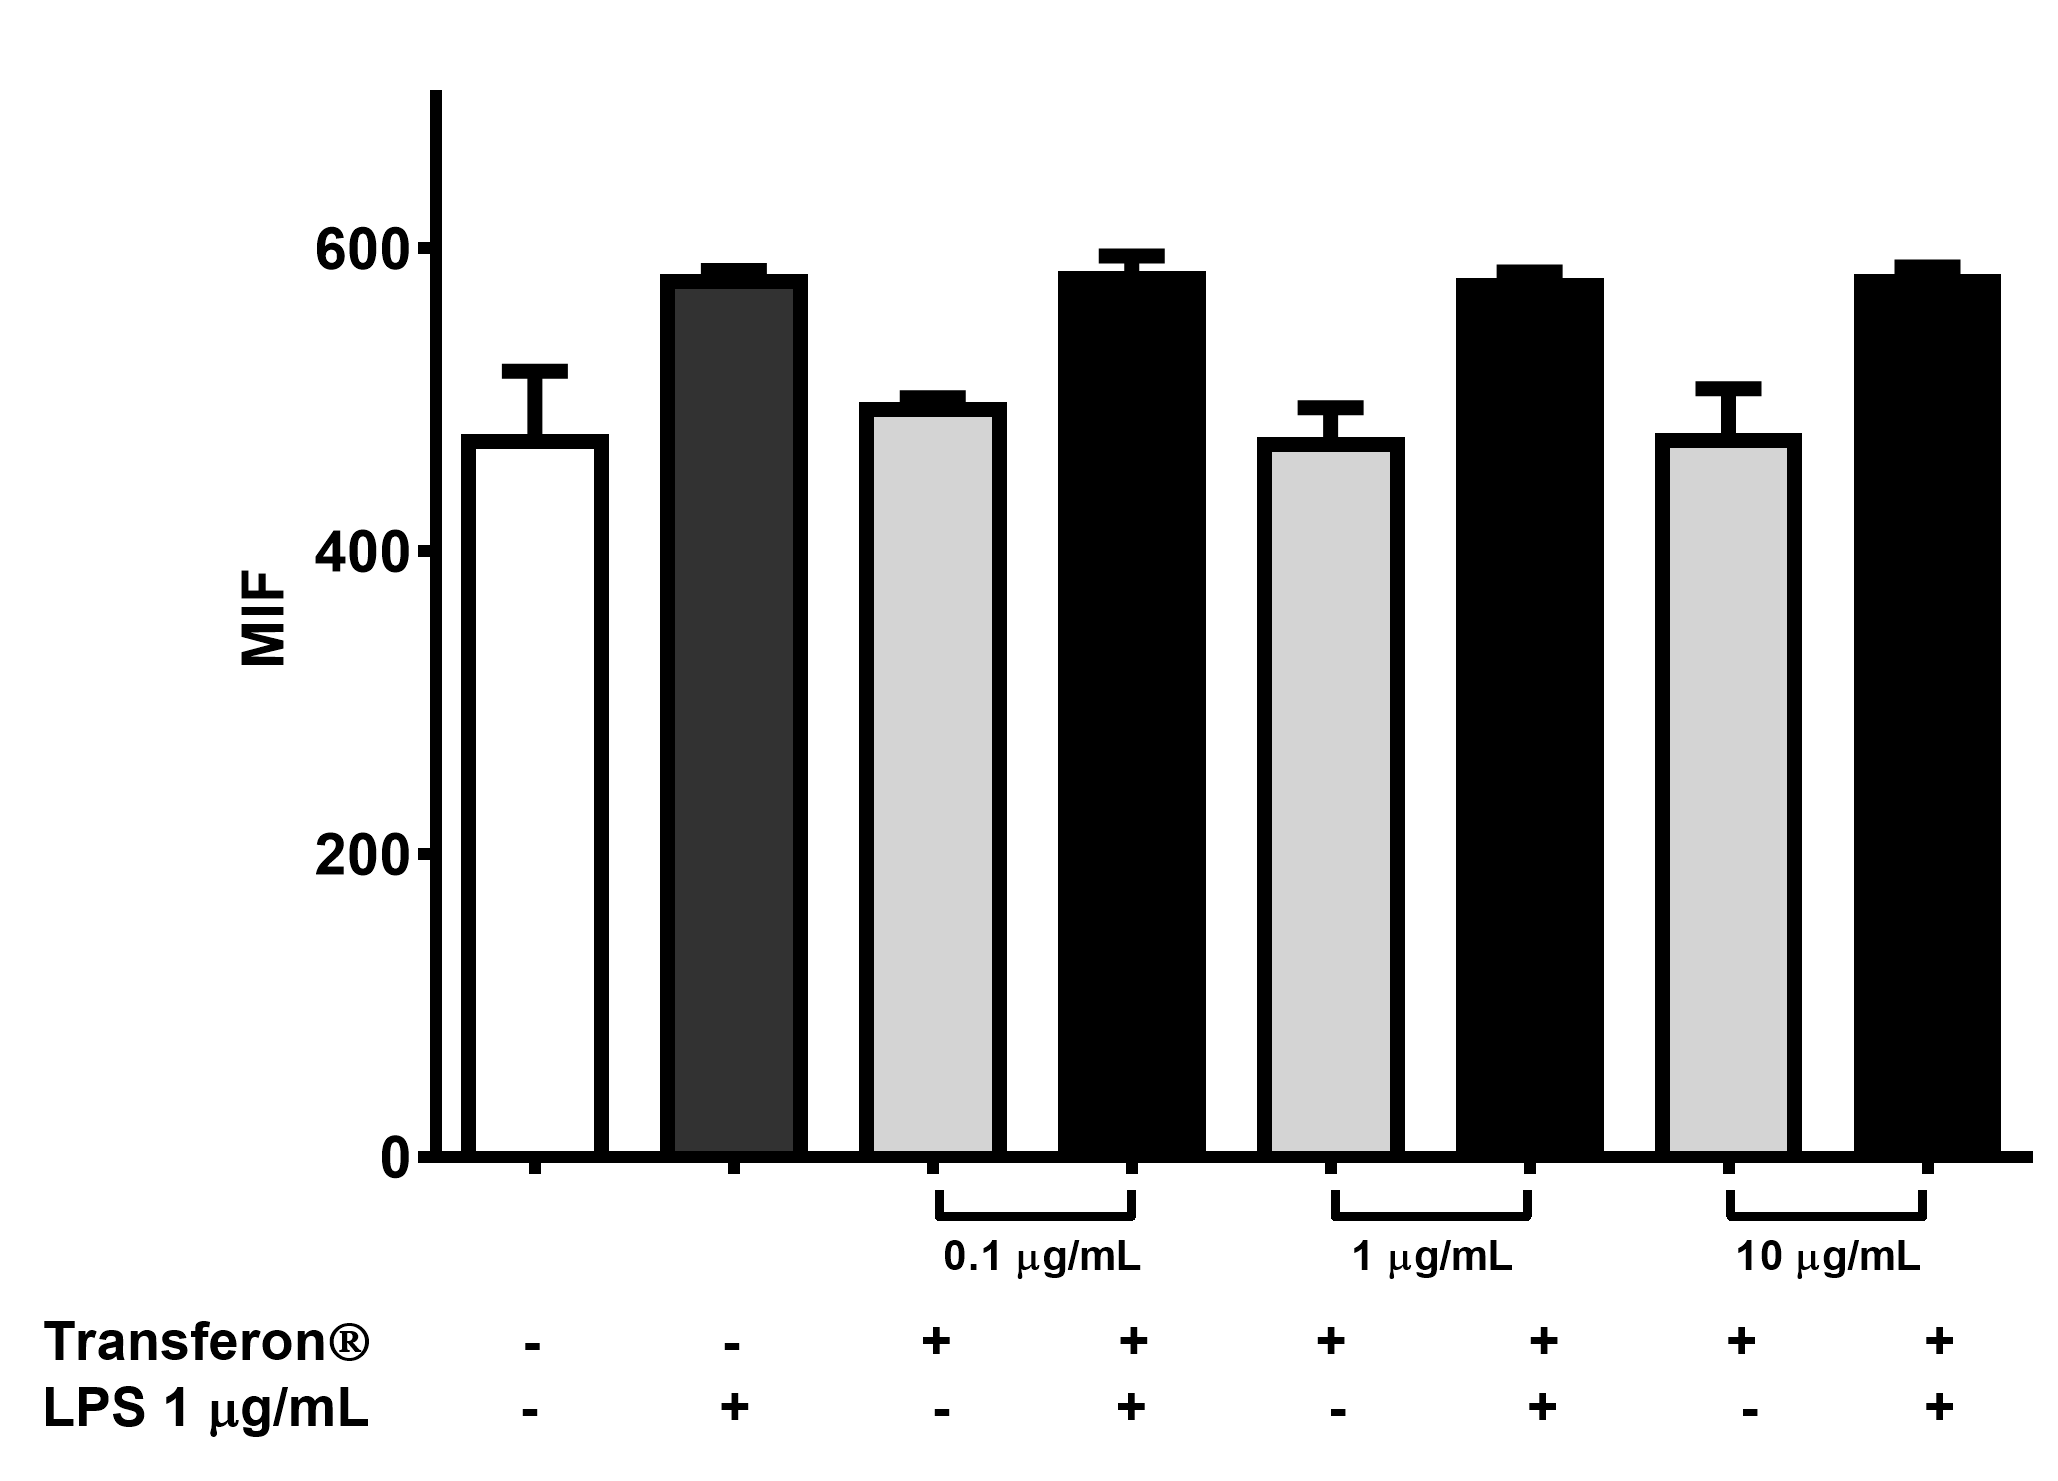


**Supplementary Figure 1. Transferon® did not modified HLA-DR expression** Macrophage-like THP1 cells were treated with 0.1 g/mL, 1 g/mL and 10 g/mL of Transferon® with or without LPS. After 24 hours of exposure, the cells were stained with an anti-HLA-DR.
